# Supplementary material
Source: ML conference proceedings conference paper supplement (https://openaccess.thecvf.com/content/cvpr_2016/html/Pham_Efficient_Point_Process_2016_CVPR_paper.html)
Supplement: Supplementary file 1 [file Pham_Efficient_Point_Process_2016_CVPR_supplemental.pdf]

# Efficient Point Process Inference for Large-Scale Object Detection

## Supplemental Material

Trung T. Pham, Seyed Hamid Rezatofighi, Ian Reid and Tat-Jun Chin  
 School of Computer Science  
 The University of Adelaide

{trung.pham, hamid.rezatofighi, ian.reid, tjchin}@adelaide.edu.au

### Proof of Proposition 1

For convenience, we restate the energy functions and the proposition in the main paper. Consider the following two energy functions:

$$E(X) = \sum_{i=1}^N D(u_i)x_i + \sum_{x_i \sim x_j} V(u_i, u_j)x_i x_j. \quad (1)$$

$$V(u_i, u_j) = \begin{cases} g(\mathcal{R}(u_i, u_j)) & \text{if } \mathcal{R}(u_i, u_j) < T_o \\ K & \text{if } \mathcal{R}(u_i, u_j) \geq T_o, \end{cases} \quad (2)$$

where  $g(\mathcal{R}(u_i, u_j)) \geq 0$ , and  $K$  is a large constant number, i.e.,  $K \gg g(\mathcal{R}(u_i, u_j))$  and  $K \gg \sup(D(u_i)) \forall u_i, u_j$ .

$$\hat{E}(X) = \sum_{i=1}^N D(u_i)x_i + \sum_{x_i \sim x_j} \hat{V}(u_i, u_j)x_i x_j. \quad (3)$$

$$\hat{V}(u_i, u_j) = \begin{cases} g(\mathcal{R}(u_i, u_j)) & \text{if } \mathcal{R}(u_i, u_j) < T_o \\ \alpha & \text{if } \mathcal{R}(u_i, u_j) \geq T_o, \end{cases} \quad (4)$$

where  $\alpha = \max(|D(u_i)|, |D(u_j)|) + \epsilon$ ;  $\epsilon$  is a small positive number. For notational simplicity, we denote  $D(x_i) = D(u_i)x_i$ ,  $V(x_i, x_j) = V(u_i, u_j)x_i x_j$ ,  $\hat{V}(x_i, x_j) = \hat{V}(u_i, u_j)x_i x_j$ , and  $\mathcal{R}(x_i, x_j) = \mathcal{R}(u_i, u_j)x_i x_j$ .

**Lemma 1.** *If  $X^*$  is the global optimum of  $E(X)$ ,  $\mathcal{R}(x_i, x_j) < T_o, \forall x_i \sim x_j, x_i, x_j \in X^*$ .*

*Proof.* If there exists a pair  $x_i \sim x_j, x_i, x_j \in X^*$  such that  $\mathcal{R}(x_i, x_j) \geq T_o$ , then

$$E(X^*) > 0 = E(\mathbf{0}) \quad (5)$$

where  $\mathbf{0}$  is a all-zero vector of length  $N$ . This is because  $V(x_i, x_j) = K$  ( $K \gg g(\mathcal{R}(u_i, u_j))$ ) and  $K \gg \sup(D(u_i)) \forall u_i, u_j$ . This contradicts the fact that  $X^*$  is a global minimizer of  $E(X)$ .  $\square$

**Lemma 2.** *If  $X^*$  is the global optimum of  $\hat{E}(X)$ ,  $\mathcal{R}(x_i, x_j) < T_o, \forall x_i \sim x_j, x_i, x_j \in X^*$ .*

*Proof.* If there exists a pair  $x_i \sim x_j, x_i, x_j \in X^*$  such that  $\mathcal{R}(x_i, x_j) \geq T_o$ , then construct a solution  $Z = X^*$ , except  $z_i = 0$  (i.e.  $\forall j \neq i, z_j = x_j, z_i = 0$ ). Note that  $x_i = x_j = 1$  since  $\mathcal{R}(x_i, x_j) \geq T_o$ . Consider

$$\begin{aligned} \hat{E}(X^*) - \hat{E}(Z) &= D(x_j) + \hat{V}(x_i, x_j) + \sum_{\substack{x_k \sim x_i \\ k \neq j}} \hat{V}(x_i, x_k) \\ &= D(x_j) + \max(|D(x_i)|, |D(x_j)|) + \epsilon + \sum_{\substack{x_k \sim x_i \\ k \neq j}} \hat{V}(x_i, x_k) > 0. \end{aligned} \quad (6)$$

Therefore  $\hat{E}(X^*) > \hat{E}(Z)$ , which contradicts  $X^*$  is a global minimizer of  $\hat{E}(X)$ .

If  $X^*$  contains a set of pairs  $\mathcal{E} = \{x_i \sim x_j \mid i > j, x_i, x_j \in X^*, \mathcal{R}(x_i, x_j) \geq T_o\}$ , let define a solution  $Z = X^*$ , except that  $z_i = 0, \forall x_i \sim x_j \in \mathcal{E}$ , then consider

$$\begin{aligned} \hat{E}(X^*) - \hat{E}(Z) &= \sum_{\substack{x_j \\ x_i \sim x_j \in \mathcal{E}}} D(x_j) + \sum_{x_i \sim x_j \in \mathcal{E}} \hat{V}(x_i, x_j) + \sum_{\substack{x_k \sim x_i \\ x_k \sim x_i \notin \mathcal{E}}} \hat{V}(x_k, x_i) \\ &= \sum_{\substack{x_j \\ x_i \sim x_j \in \mathcal{E}}} D(x_j) + \sum_{x_i \sim x_j \in \mathcal{E}} (\max(|D(x_i)|, |D(x_j)|) + \epsilon) + \sum_{\substack{x_k \sim x_i \\ x_k \sim x_i \notin \mathcal{E}}} \hat{V}(x_k, x_i) > 0. \end{aligned} \quad (7)$$

As a result  $\hat{E}(X^*) > \hat{E}(Z)$ , which contradicts  $X^*$  is a global minimizer of  $\hat{E}(X)$ . □

**Lemma 3.** For all  $X$ , if  $\forall x_i \sim x_j, x_i, x_j \in X, \mathcal{R}(x_i, x_j) < T_o, \hat{E}(X) = E(X)$ .

*Proof.* As  $\mathcal{R}(x_i, x_j) < T_o \Rightarrow \hat{V}(x_i, x_j) = V(x_i, x_j)$ . Therefore  $\hat{E}(X) = E(X)$ . □

**Lemma 4.** If  $X^*$  is the global optimum of  $\hat{E}(X), \hat{E}(X^*) = E(X^*)$ .

*Proof.* Since  $X^*$  is the global optimum of  $\hat{E}(X)$ , using Lemma 2, we get  $\forall x_i \sim x_j, x_i, x_j \in X^*, \mathcal{R}(x_i, x_j) < T_o$ . As a result,  $E(X^*) = \hat{E}(X^*)$ . □

**Proposition 1.** If  $X^*$  is the globally minimal solution of the energy function  $\hat{E}(X), X^*$  is also the global minimizer of the function  $E(X)$ , and vice versa.

*Proof.*

Typically the proposition 1 says that the two energy functions  $E(X)$  and  $\hat{E}(X)$  admit the same global minimizer  $X^*$ . In fact, assume that  $X_o^*$  and  $X_n^*$  are the global optimum of the energies  $E(X)$  and  $\hat{E}(X)$  respectively. Denote  $\mathcal{X} = \{X \mid \forall x_i \sim x_j, x_i, x_j \in X, \mathcal{R}(x_i, x_j) < T_o\}$ . Lemmas 1 and 2 say that  $X_o^* \in \mathcal{X}$  and  $X_n^* \in \mathcal{X}$ . Moreover lemma 3 reveals that  $E(X) = \hat{E}(X), \forall X \in \mathcal{X}$ . Therefore we can conclude that  $X_o^* = X_n^* = X^*$ . □

*Proof.* (By contradiction)

We start proving the first part of the proposition 1. Suppose that  $X^*$  is the global optimum of  $\hat{E}(X)$ , i.e.,

$$\hat{E}(X^*) \leq \hat{E}(X), \forall X, \quad (8)$$

we want to prove that  $X^*$  is also a global minimum of  $E(X)$  Assume that  $X^*$  is not the global optimum of  $E(X)$ , then there exists a solution  $Y$  such that

$$E(Y) < E(X^*). \quad (9)$$

Now we consider the following scenarios:

1.  $\forall y_i \sim y_j, y_i, y_j \in Y, \mathcal{R}(y_i, y_j) < T_o$ .

Using Lemma 3, we obtain

$$E(Y) = \hat{E}(Y). \quad (10)$$

Since  $E(Y) \leq E(X^*)$  (see (9)),  $\hat{E}(Y) \leq E(Y)$  and  $\hat{E}(X^*) = E(X^*)$  (using Lemma 4), we arrive at  $\hat{E}(Y) < \hat{E}(X^*)$  which contradicts (8).

2.  $\exists y_i \sim y_j, y_i, y_j \in Y$  such that  $\mathcal{R}(y_i, y_j) \geq T_o$ .

Let define a solution  $Z = Y$ , except  $z_i = 0$  (i.e.  $\forall j \neq i, z_j = y_j, z_i = 0$ ). Note that  $y_i = y_j = 1$  since  $\mathcal{R}(y_i, y_j) \geq T_o$ . Consider

$$E(Y) - E(Z) = D(y_j) + V(y_i, y_j) + \sum_{\substack{y_k \sim y_i \\ k \neq j}} V(y_i, y_k) = D(y_j) + K + \sum_{\substack{y_k \sim y_i \\ k \neq j}} V(y_i, y_k) > 0. \quad (11)$$

Therefore  $E(Z) < E(Y)$ , and  $\hat{E}(Z) \leq E(Z) < E(Y) < E(X^*)$ . As  $\hat{E}(X^*) = E(X^*)$  (using Lemma 4),  $\hat{E}(Z) < \hat{E}(X^*)$ , which again contradicts (8).

3.  $Y$  contains a set of pairs  $\mathcal{E} = \{y_i \sim y_j \mid i > j, y_i, y_j \in Y, \mathcal{R}(y_i, y_j) \geq T_o\}$ .

Similar to the above reasoning, let define a solution  $Z = Y$ , except that  $z_i = 0, \forall y_i \sim y_j \in \mathcal{E}$ , then consider

$$\begin{aligned} E(Y) - E(Z) &= \sum_{\substack{y_j \\ y_i \sim y_j \in \mathcal{E}}} D(y_j) + \sum_{y_i \sim y_j \in \mathcal{E}} V(y_i, y_j) + \sum_{\substack{y_k \sim y_i \\ y_k \sim y_i \notin \mathcal{E}}} V(y_k, y_i) \\ &= \sum_{\substack{y_j \\ y_i \sim y_j \in \mathcal{E}}} D(y_j) + |\mathcal{E}|K + \sum_{\substack{y_k \sim y_i \\ y_k \sim y_i \notin \mathcal{E}}} V(y_k, y_i) > 0, \end{aligned} \quad (12)$$

where  $|\mathcal{E}|$  is the number of pairs in  $\mathcal{E}$ . As a result  $E(Z) < E(Y)$ , and  $\hat{E}(Z) \leq E(Z) < E(Y) < E(X^*)$ . As  $\hat{E}(X^*) = E(X^*)$  (using Lemma 4),  $\hat{E}(Z) < \hat{E}(X^*)$ , which again contradicts (8).

It can be seen that the above assumption is always wrong, thus  $X^*$  is the global optimum of  $E(X)$ . The second part of the proposition 1 can be proved similarly. Suppose that  $X^*$  is the global optimum of  $E(X)$ , i.e.,

$$E(X^*) \leq E(X), \forall X, \quad (13)$$

we want to prove that  $X^*$  is also a global minimum of  $\hat{E}(X)$ . Assume that  $X^*$  is not the global optimum of  $\hat{E}(X)$ , then there exists a solution  $Y$  such that

$$\hat{E}(Y) < \hat{E}(X^*).$$

If  $Y$  contains no pairs  $y_i \sim y_j$  such that  $\mathcal{R}(y_i, y_j) < T_o$ , Lemma 3 says

$$E(Y) = \hat{E}(Y). \quad (14)$$

Since  $\hat{E}(Y) < \hat{E}(X^*)$  and  $\hat{E}(X^*) \leq E(X^*)$ , we arrive at  $E(Y) < E(X^*)$  which contradicts (13).

If the solution  $Y$  contains a set of pairs  $\mathcal{E} = \{y_i \sim y_j \mid i > j, y_i, y_j \in Y, \mathcal{R}(y_i, y_j) \geq T_o\}$ , let define a solution  $Z = Y$ , except that  $z_i = 0, \forall y_i \sim y_j \in \mathcal{E}$ , then consider

$$\begin{aligned} \hat{E}(Y) - \hat{E}(Z) &= \sum_{\substack{y_j \\ y_i \sim y_j \in \mathcal{E}}} D(y_j) + \sum_{y_i \sim y_j \in \mathcal{E}} \hat{V}(y_i, y_j) + \sum_{\substack{y_k \sim y_i \\ y_k \sim y_i \notin \mathcal{E}}} \hat{V}(y_k, y_i) \\ &= \sum_{\substack{y_j \\ y_i \sim y_j \in \mathcal{E}}} D(y_j) + \sum_{y_i \sim y_j \in \mathcal{E}} (\max(|D(y_i)|, |D(y_j)|) + \epsilon) + \sum_{\substack{y_k \sim y_i \\ y_k \sim y_i \notin \mathcal{E}}} \hat{V}(y_k, y_i) > 0. \end{aligned} \quad (15)$$

As a result  $\hat{E}(Z) < \hat{E}(Y)$ . Moreover since  $E(Z) = \hat{E}(Z)$  (using Lemma 3),

$$E(Z) < \hat{E}(Y) < \hat{E}(X^*) < E(X^*). \quad (16)$$

As a result,  $E(Z) < E(X^*)$ , which contradicts (13). Consequently  $X^*$  is the global minimum of  $\hat{E}(X)$ . □
